# Supplementary material for: Viral Quasispecies Assembly via Maximal Clique Enumeration
Source: PLOS journal article supplement (doi:10.1371/journal.pcbi.1003515), 2014-03-27
Supplement: S4 (10.1371/journal.pcbi.1003515.s004) [file journal.pcbi.1003515.s004]

**A**

internal segment size difference too large

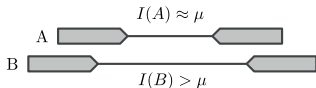

no edge

**B**

both alignment pairs suggest deletion but overlap too small

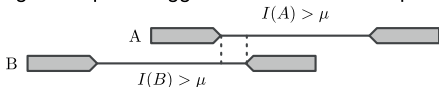

no edge

**C**

two alignments with average internal segment size

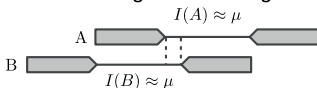

draw edge

**D**

two deletion-suggesting pairs with sufficient overlap

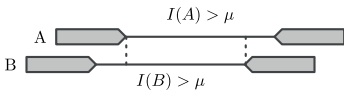

draw edge
